# Supplementary material for: Cationic ruthenium alkylidene catalysts bearing phosphine ligands
Source: Royal Society of Chemistry journal article supplement (doi:10.1039/c5dt04506a), 2016-01-01
Supplement: c5dt04506a1.pdf [file c5dt04506a1.pdf]

## Supporting Information for

# Cationic Ruthenium Alkylidene Catalysts Bearing Phosphine Ligands

Koji Endo and Robert H. Grubbs\*

*Arnold and Mabel Beckman Laboratory of Chemical Synthesis, Division of Chemistry and Chemical Engineering, California Institute of Technology, Pasadena, California 91125, United States*

### List of Figures and Tables

|                                                                     |     |
|---------------------------------------------------------------------|-----|
| <b>Figure S1.</b> <sup>1</sup> H NMR spectrum of <b>8a</b> .....    | S2  |
| <b>Figure S2.</b> <sup>13</sup> C NMR spectrum of <b>8a</b> .....   | S2  |
| <b>Figure S3.</b> <sup>31</sup> P NMR spectrum of <b>8a</b> .....   | S3  |
| <b>Figure S4.</b> <sup>1</sup> H NMR spectrum of <b>8b</b> .....    | S3  |
| <b>Figure S5.</b> <sup>13</sup> C NMR spectrum of <b>8b</b> .....   | S4  |
| <b>Figure S6.</b> <sup>31</sup> P NMR spectrum of <b>8b</b> .....   | S8  |
| <b>Figure S7.</b> <sup>1</sup> H NMR spectrum of <b>8c</b> .....    | S5  |
| <b>Figure S8.</b> <sup>13</sup> C NMR spectrum of <b>8c</b> .....   | S5  |
| <b>Figure S9.</b> <sup>31</sup> P NMR spectrum of <b>8c</b> .....   | S6  |
| <b>Figure S10.</b> <sup>1</sup> H NMR spectrum of <b>8d</b> .....   | S6  |
| <b>Figure S11.</b> <sup>13</sup> C NMR spectrum of <b>8d</b> .....  | S7  |
| <b>Figure S12.</b> <sup>31</sup> P NMR spectrum of <b>8d</b> .....  | S7  |
| <b>Figure S13.</b> <sup>1</sup> H NMR spectrum of <b>11a</b> .....  | S8  |
| <b>Figure S14.</b> <sup>13</sup> C NMR spectrum of <b>11a</b> ..... | S8  |
| <b>Figure S15.</b> <sup>31</sup> P NMR spectrum of <b>11a</b> ..... | S9  |
| <b>Figure S16.</b> <sup>1</sup> H NMR spectrum of <b>11b</b> .....  | S9  |
| <b>Figure S17.</b> <sup>13</sup> C NMR spectrum of <b>11b</b> ..... | S10 |
| <b>Figure S18.</b> <sup>31</sup> P NMR spectrum of <b>11b</b> ..... | S10 |
| <b>Table S1. Data for RCM of 12 by 7</b> .....                      | S11 |
| <b>Table S2. Data for RCM of 12 by 8a</b> .....                     | S11 |
| <b>Table S3. Data for RCM of 12 by 8b</b> .....                     | S12 |
| <b>Table S4. Data for RCM of 12 by 8c</b> .....                     | S13 |
| <b>Table S5. Data for RCM of 12 by 11a</b> .....                    | S14 |
| <b>Table S6. GC response factors and retention times</b> .....      | S15 |
| <b>Table S7. Data for CM of 14 and 15 by 7</b> .....                | S16 |
| <b>Table S8. Data for CM of 14 and 15 by 8a</b> .....               | S16 |
| <b>Table S9. Data for CM of 14 and 15 by 8b</b> .....               | S17 |
| <b>Table S10. Data for CM of 14 and 15 by 11a</b> .....             | S17 |
| <b>Table S11. Data for CM of 14 and 15 by 11b</b> .....             | S18 |

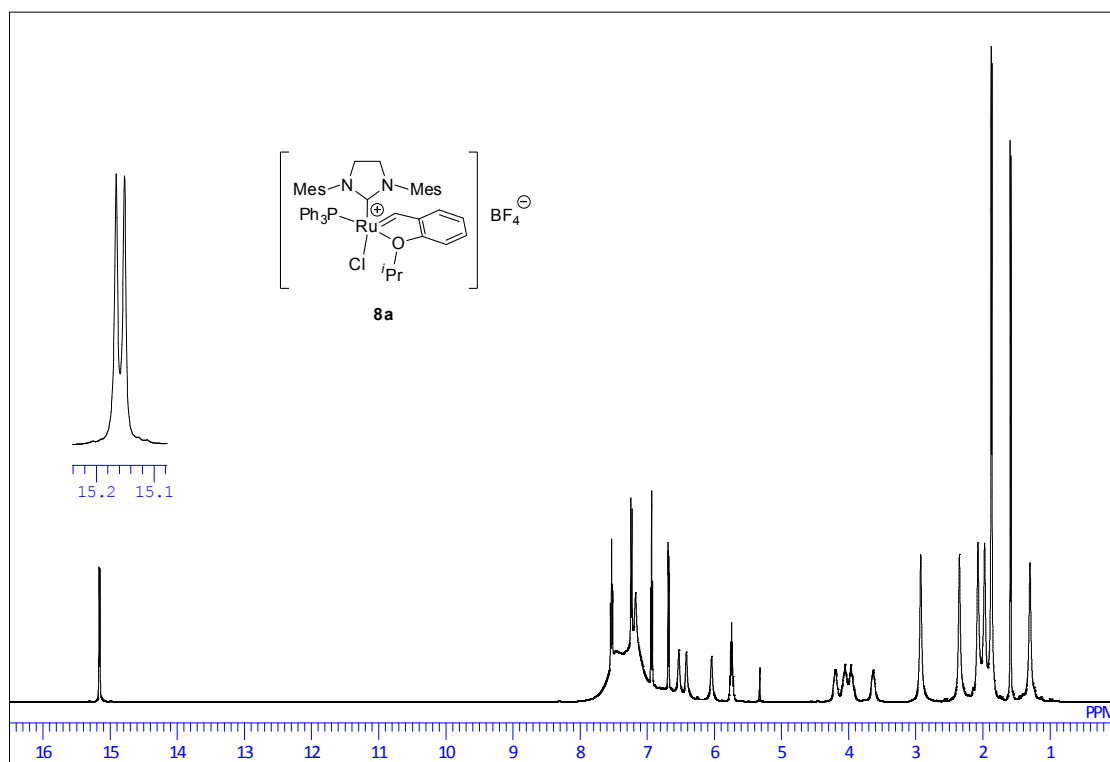

Figure S1.  $^1\text{H}$  NMR spectrum of **8a** ( $\text{CD}_2\text{Cl}_2$ , 500 MHz).

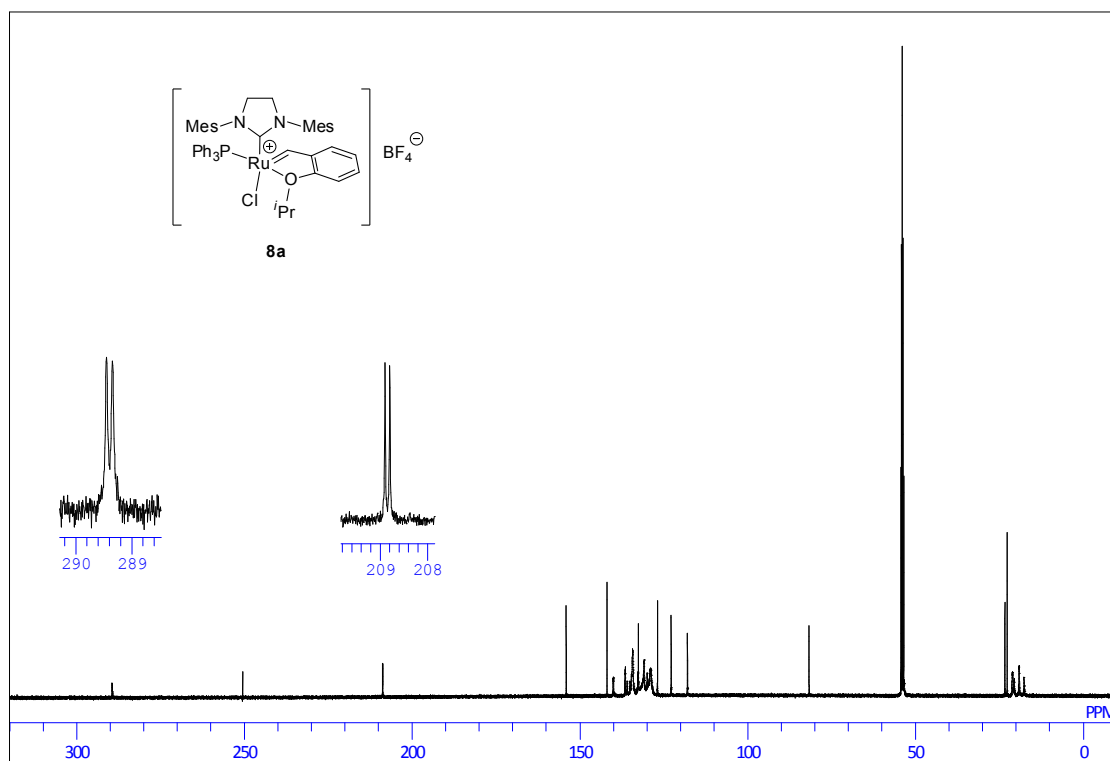

Figure S2.  $^{13}\text{C}$  NMR spectrum of **8a** ( $\text{CD}_2\text{Cl}_2$ , 125.7 MHz).

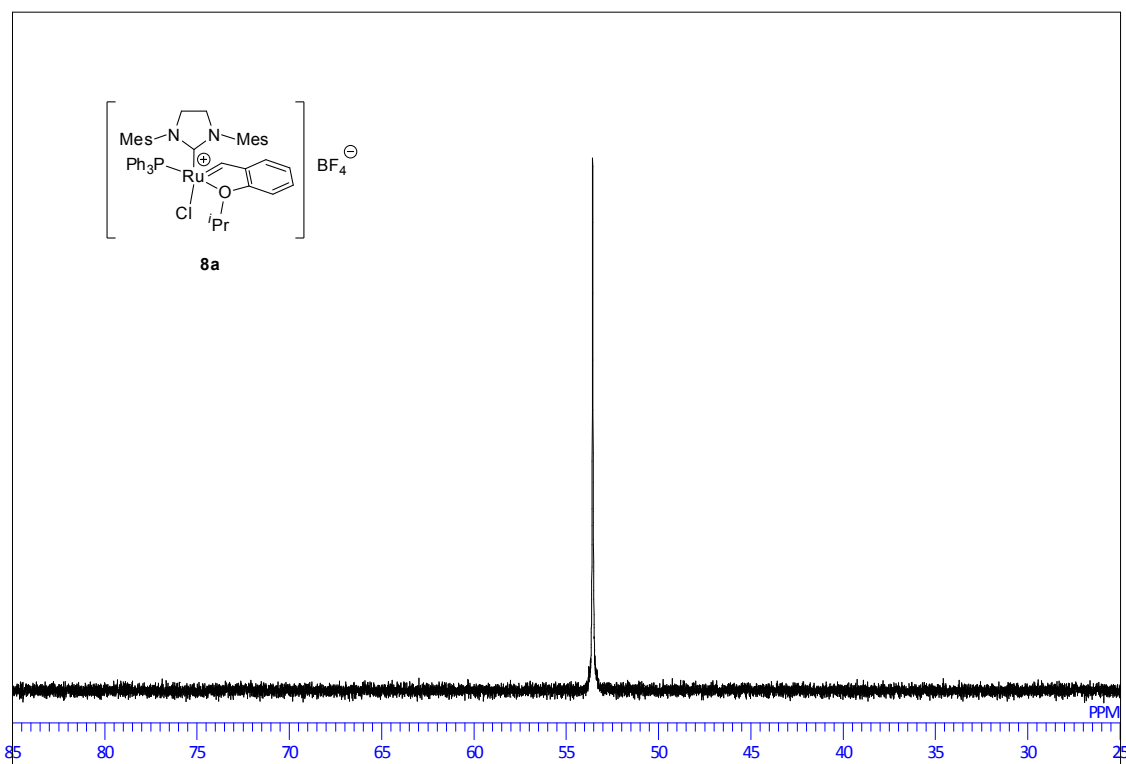

Figure S3. <sup>31</sup>P NMR spectrum of **8a** (CD<sub>2</sub>Cl<sub>2</sub>, 121.4 MHz).

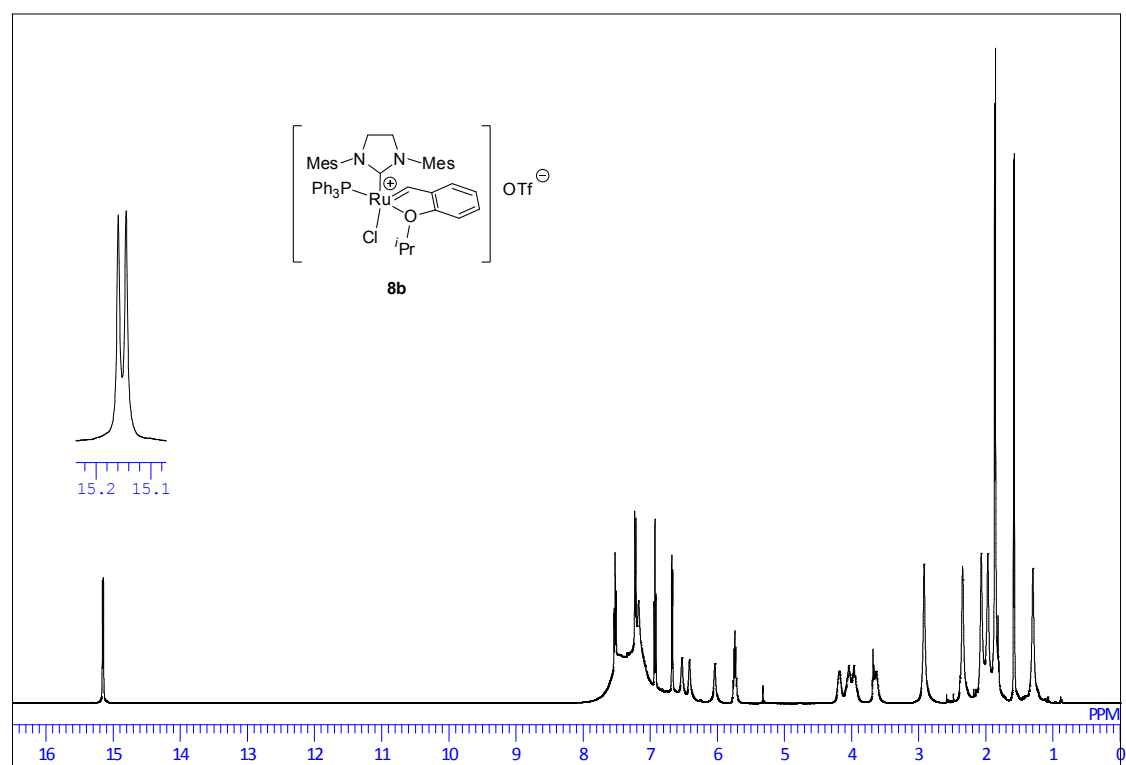

Figure S4. <sup>1</sup>H NMR spectrum of **8b** (CD<sub>2</sub>Cl<sub>2</sub>, 500 MHz).

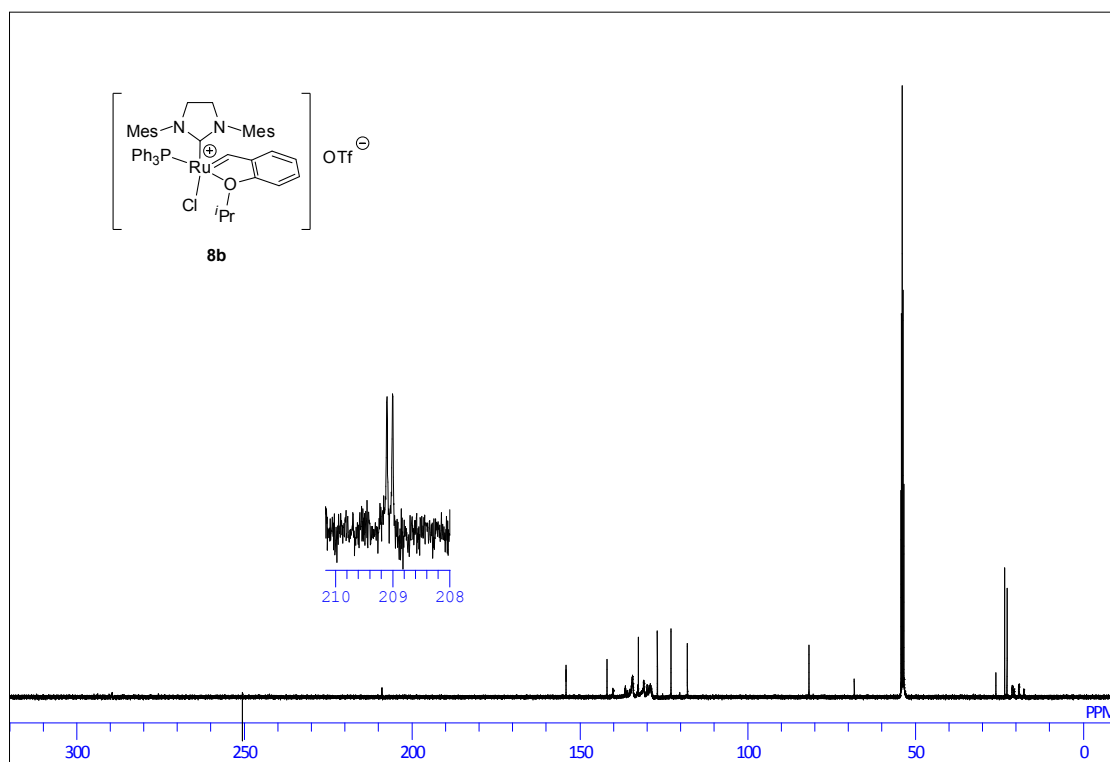

Figure S5.  $^{13}\text{C}$  NMR spectrum of **8b** ( $\text{CD}_2\text{Cl}_2$ , 125.7 MHz).

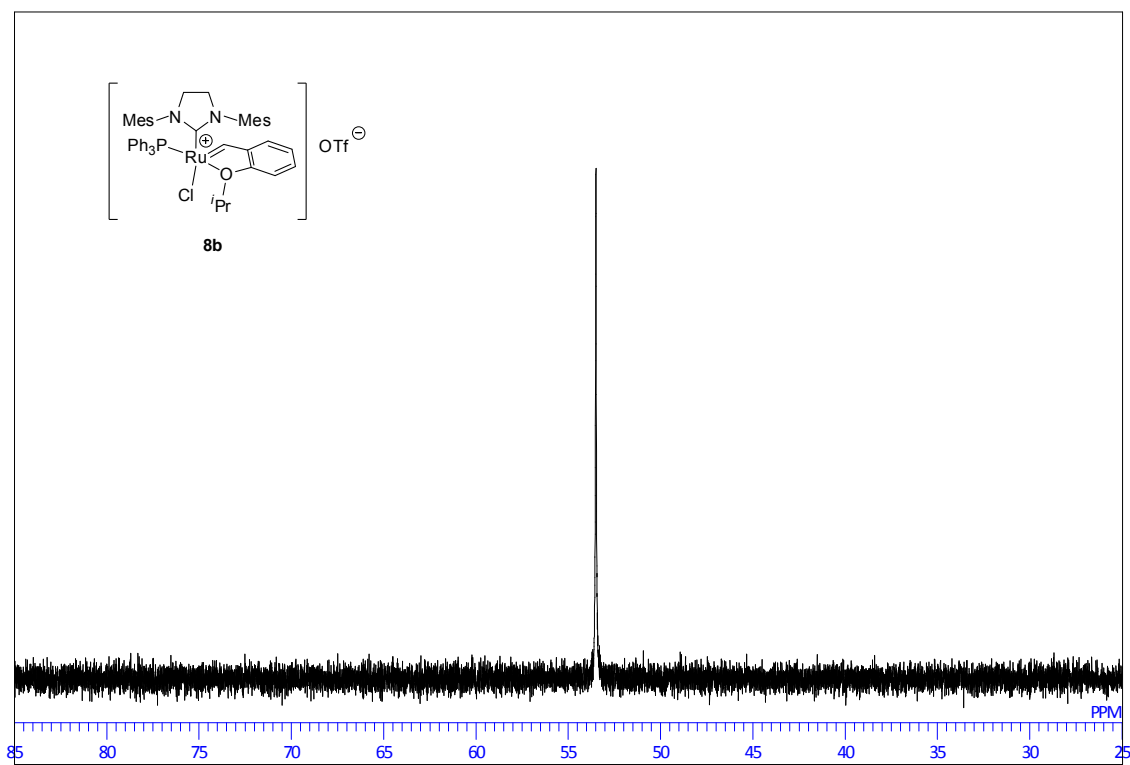

Figure S6.  $^{31}\text{P}$  NMR spectrum of **8b** ( $\text{CD}_2\text{Cl}_2$ , 121.4 MHz).

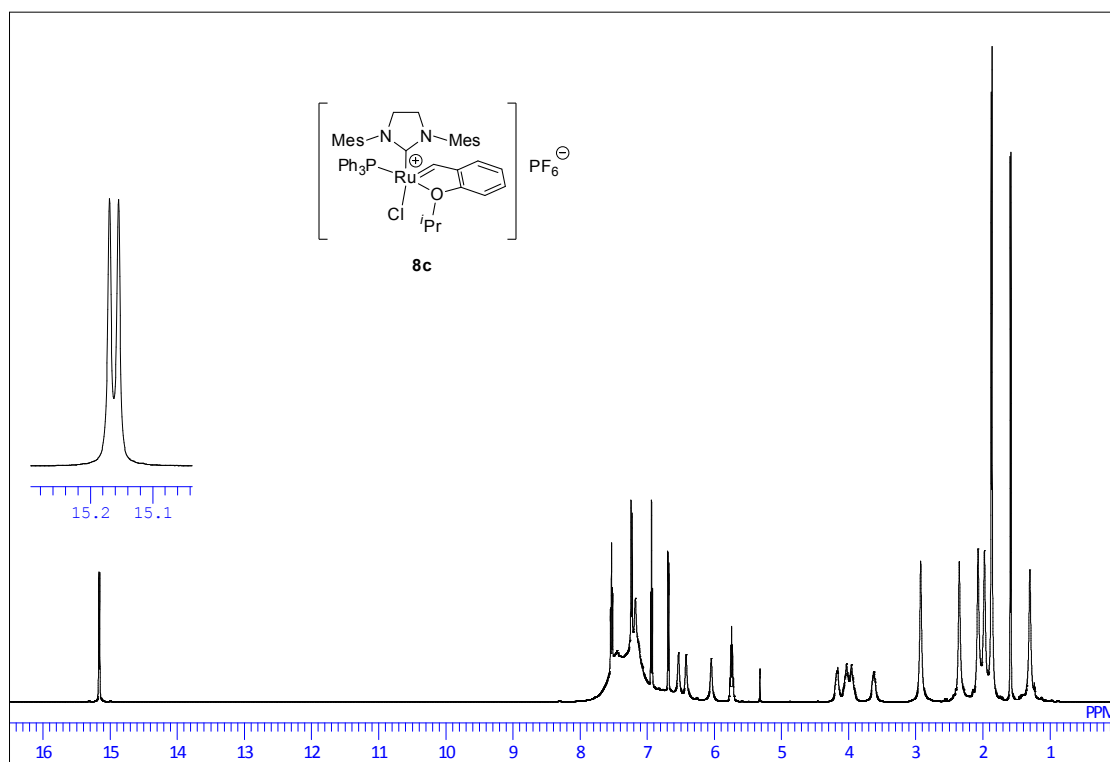

**Figure S7.**  $^1\text{H}$  NMR spectrum of **8c** (CD<sub>2</sub>Cl<sub>2</sub>, 500 MHz).

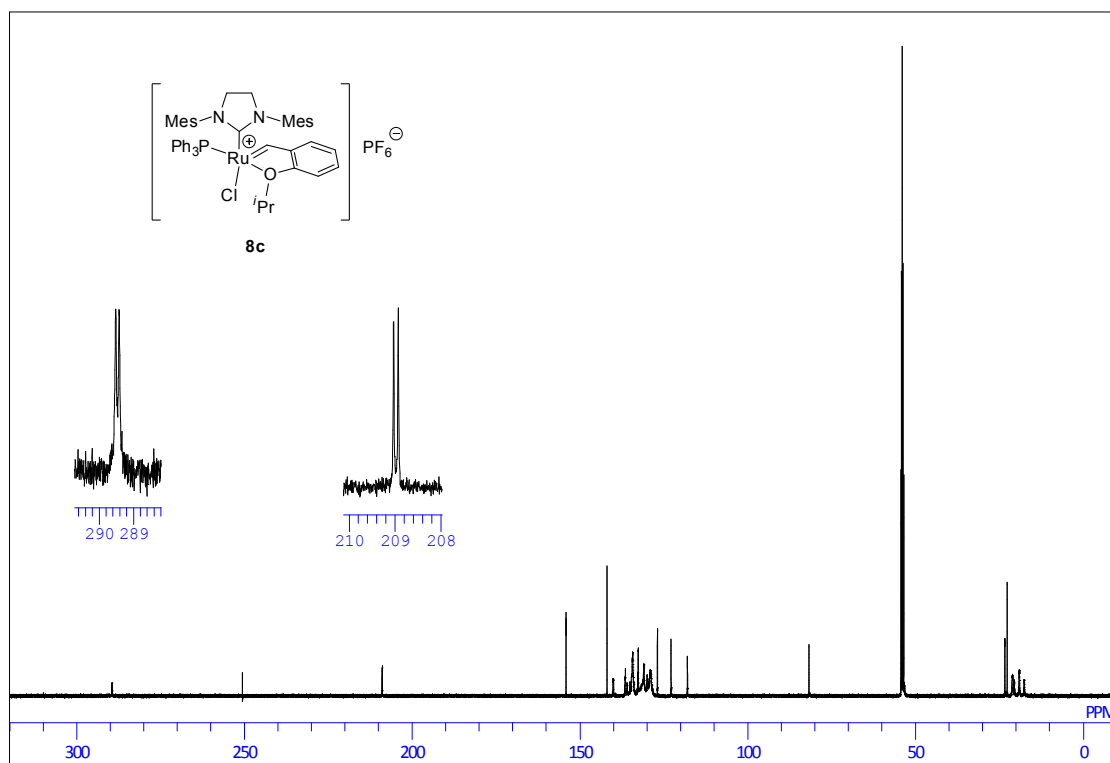

**Figure S8.**  $^{13}\text{C}$  NMR spectrum of **8c** (CD<sub>2</sub>Cl<sub>2</sub>, 125.7 MHz).

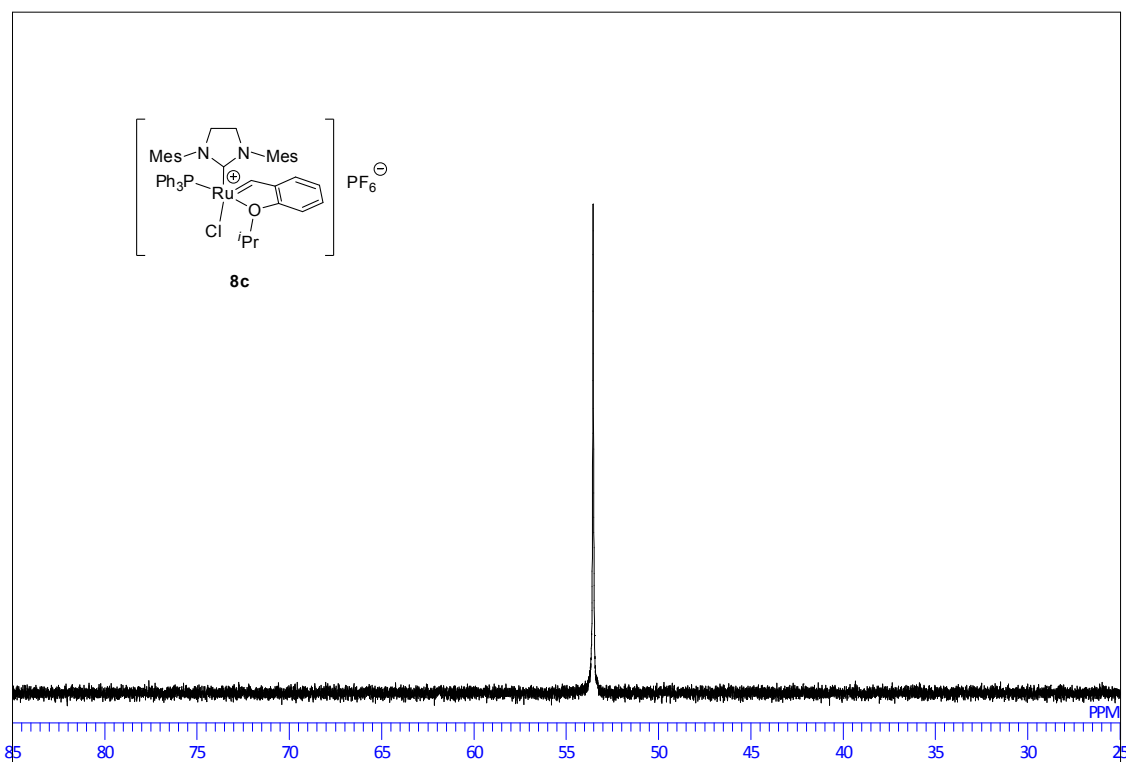

Figure S9.  $^{31}\text{P}$  NMR spectrum of **8c** ( $\text{CD}_2\text{Cl}_2$ , 121.4 MHz).

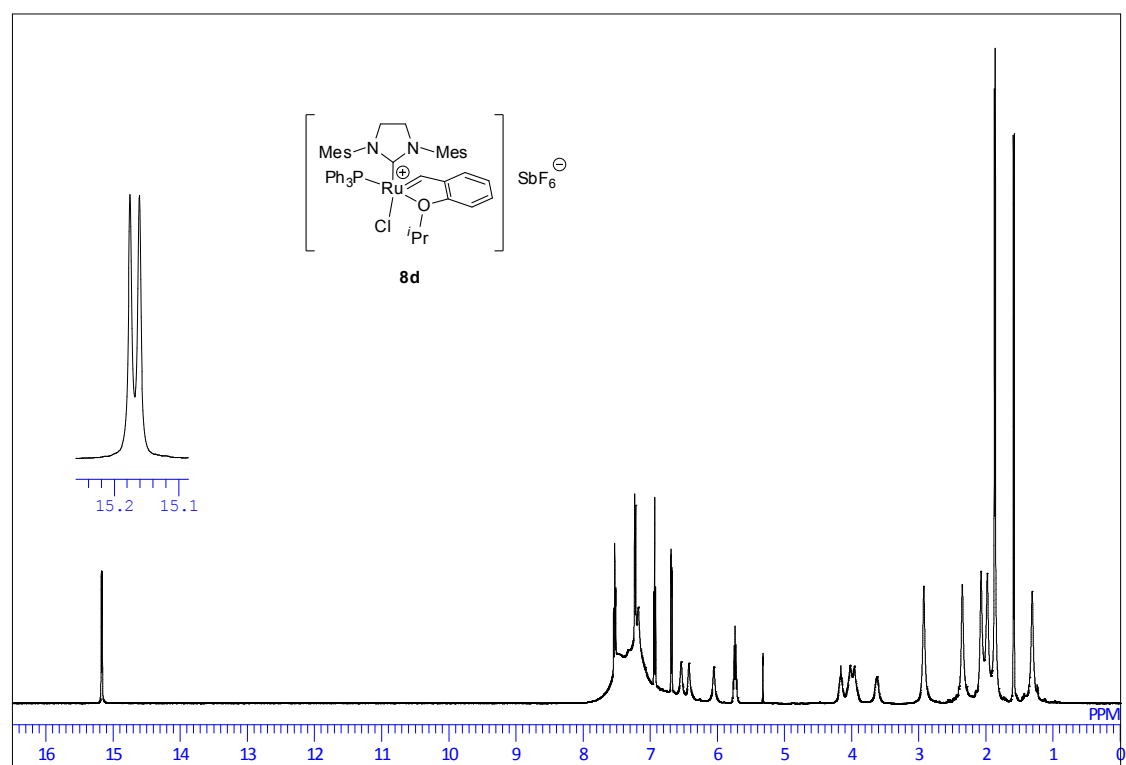

Figure S10.  $^1\text{H}$  NMR spectrum of **8d** ( $\text{CD}_2\text{Cl}_2$ , 500 MHz).

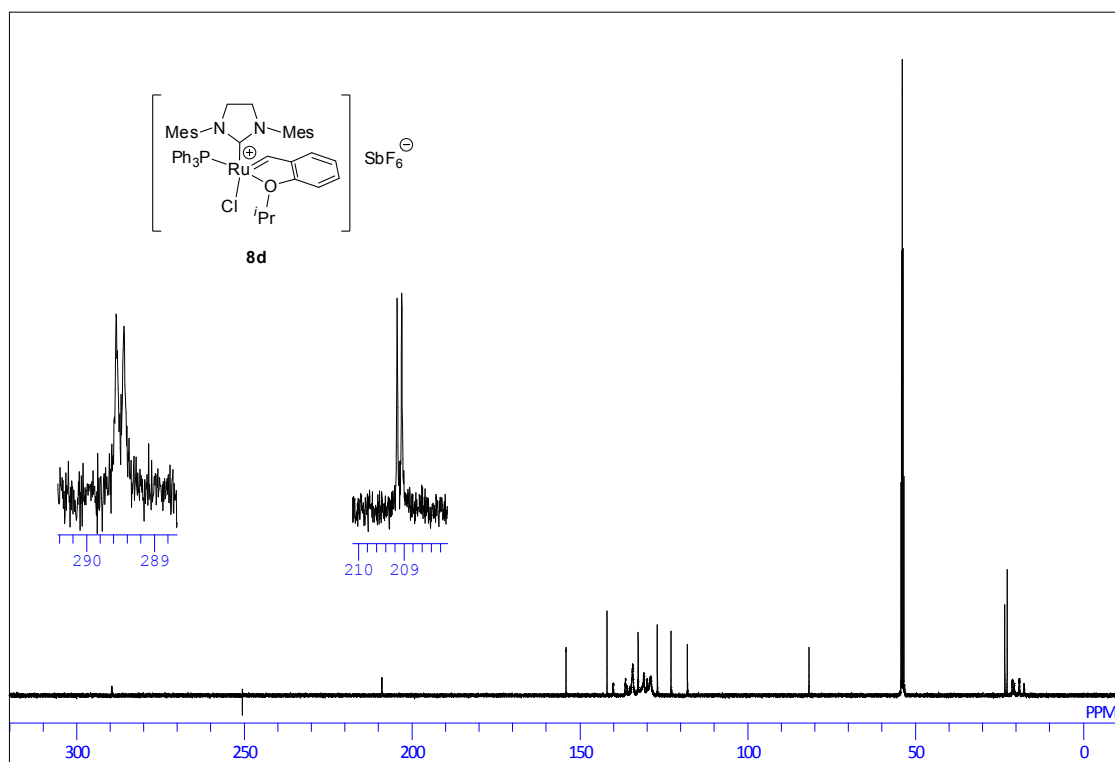

Figure S11.  $^{13}\text{C}$  NMR spectrum of **8d** ( $\text{CD}_2\text{Cl}_2$ , 125.7 MHz).

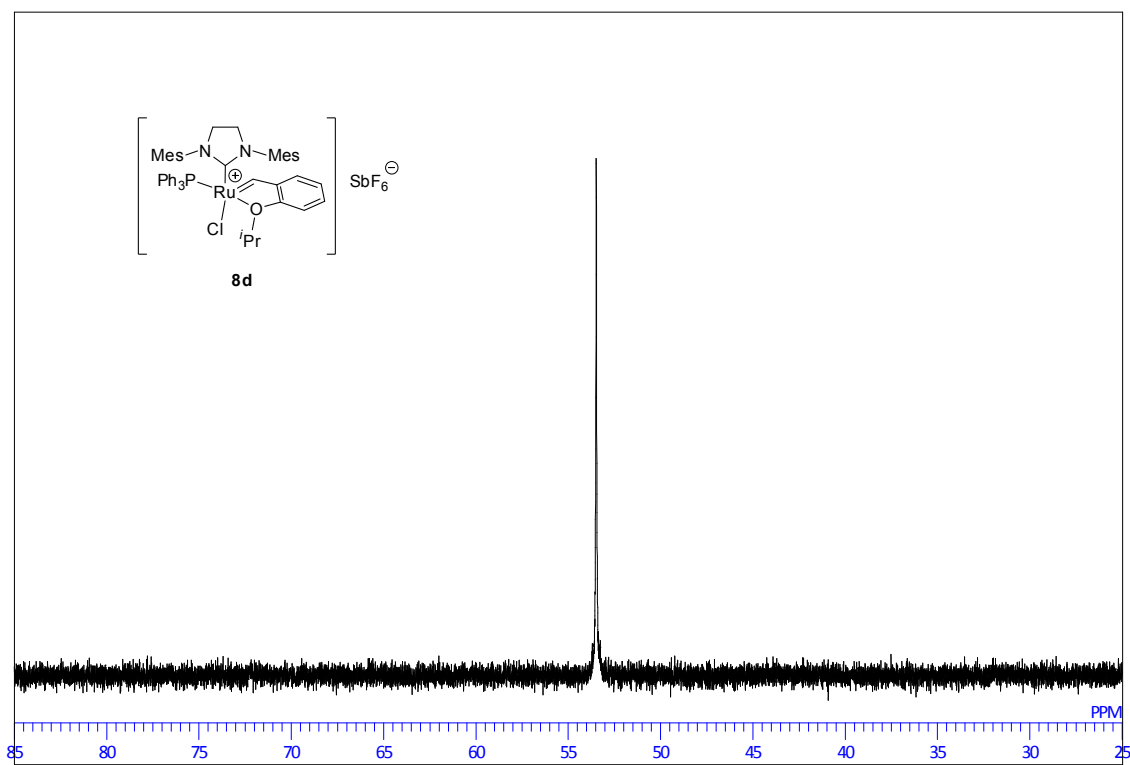

Figure S12.  $^{31}\text{P}$  NMR spectrum of **8d** ( $\text{CD}_2\text{Cl}_2$ , 121.4 MHz).

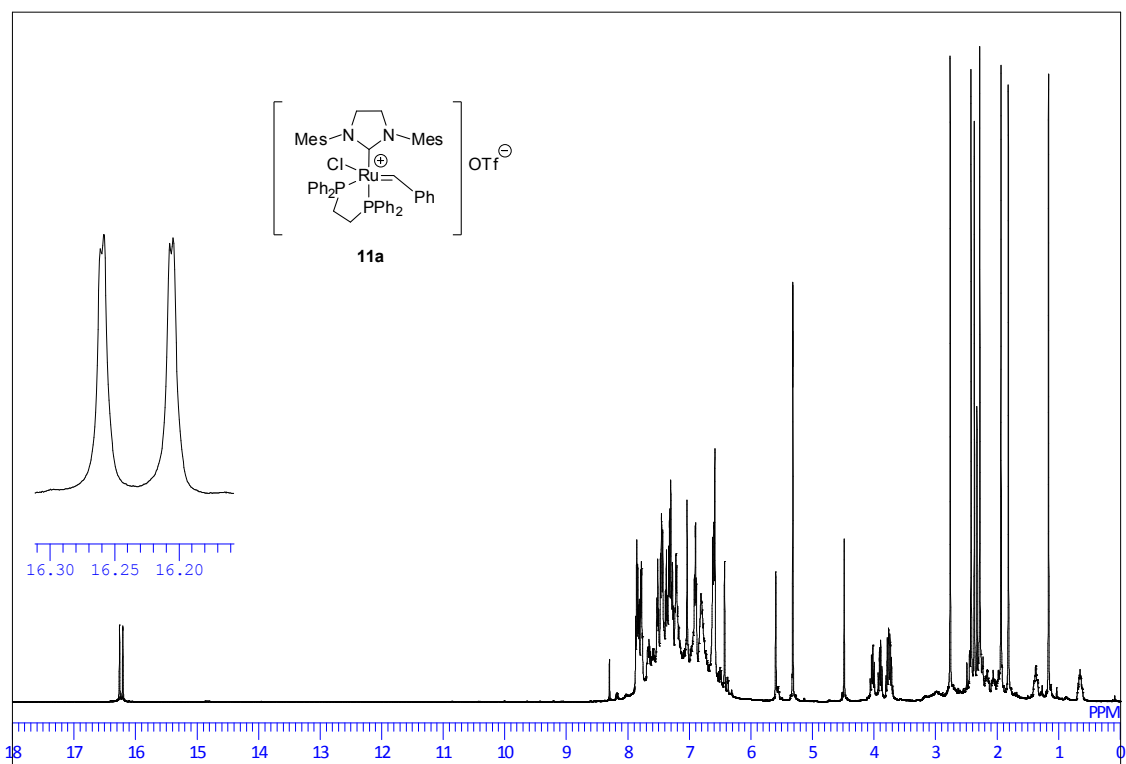

Figure S13.  $^1\text{H}$  NMR spectrum of **11a** ( $\text{CD}_2\text{Cl}_2$ , 500 MHz).

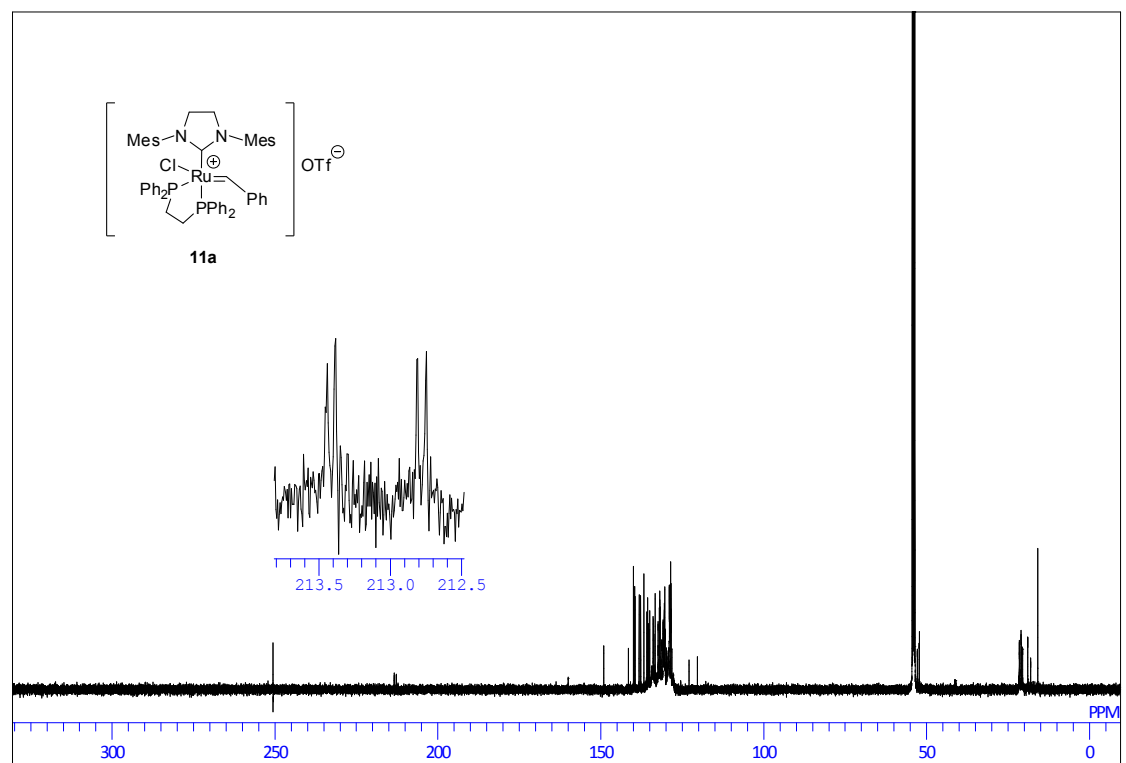

Figure S14.  $^{13}\text{C}$  NMR spectrum of **11a** ( $\text{CD}_2\text{Cl}_2$ , 125.7 MHz).



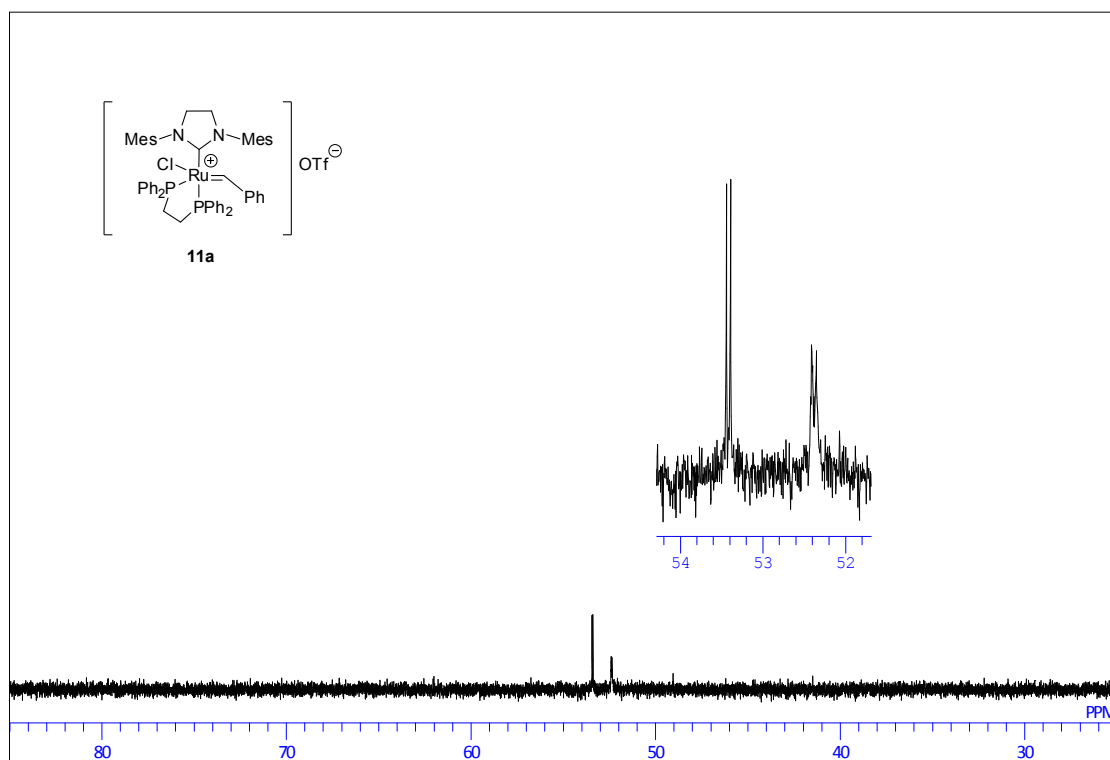

Figure S15.  $^{31}\text{P}$  NMR spectrum of **11a** ( $\text{CD}_2\text{Cl}_2$ , 121.4 MHz).

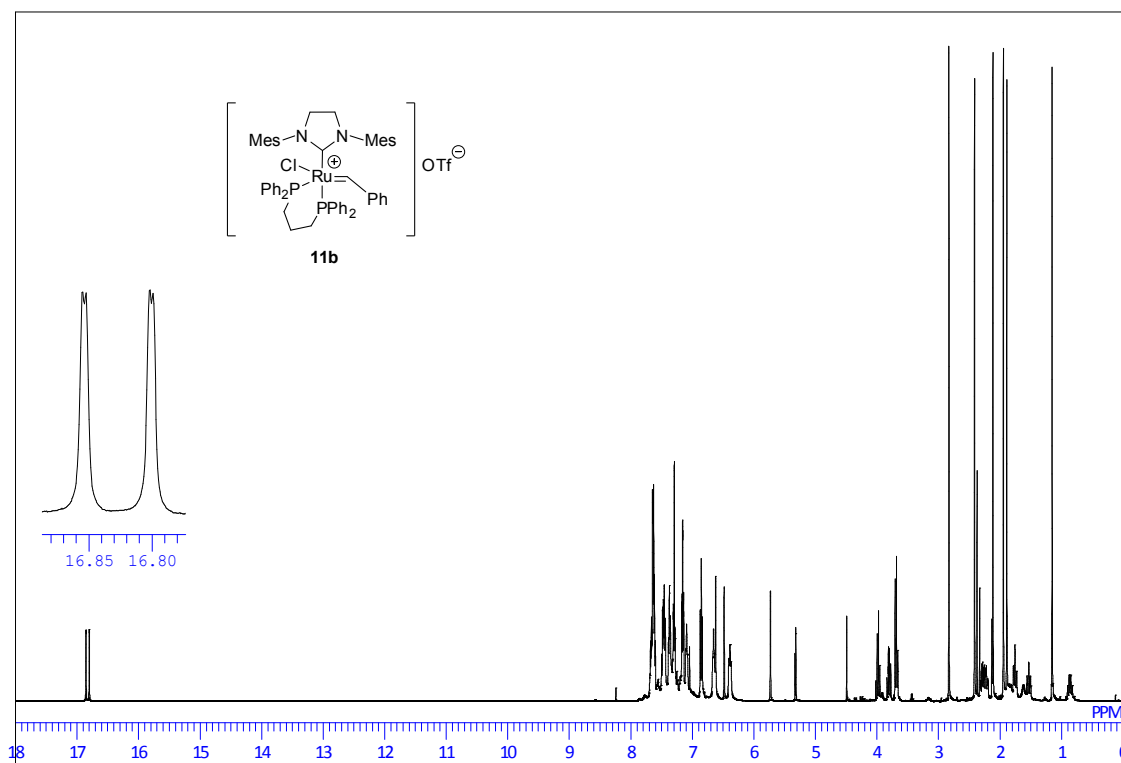

Figure S16.  $^1\text{H}$  NMR spectrum of **11b** ( $\text{CD}_2\text{Cl}_2$ , 500 MHz).

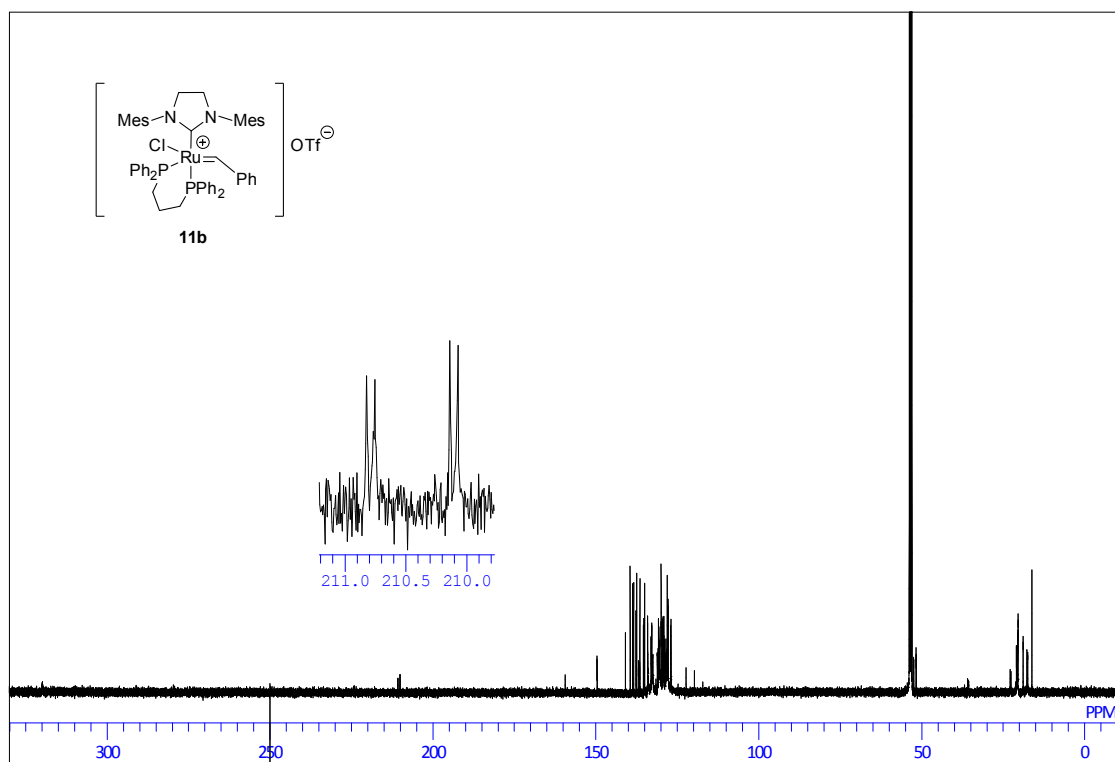

Figure S17.  $^{13}\text{C}$  NMR spectrum of **11b** ( $\text{CD}_2\text{Cl}_2$ , 125.7 MHz).

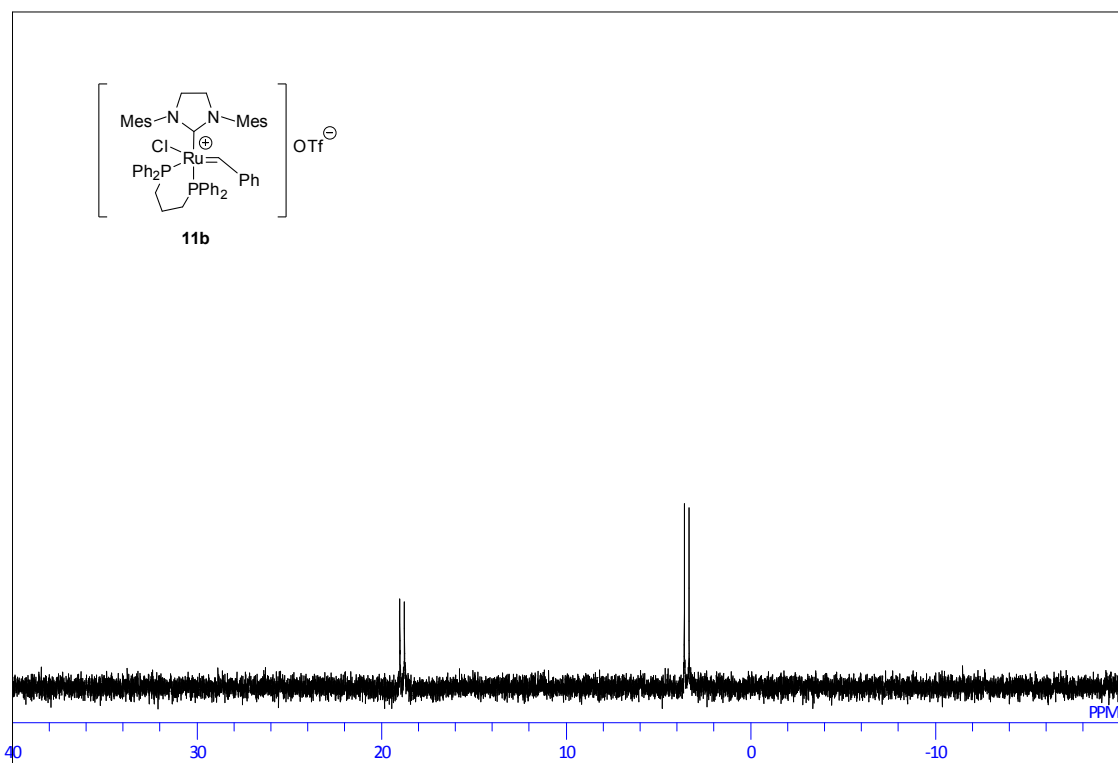

Figure S18.  $^{31}\text{P}$  NMR spectrum of **11b** ( $\text{CD}_2\text{Cl}_2$ , 121.4 MHz).

**Table S1. Data for RCM of 12 by 7<sup>a</sup>**

| time, min | conv, % <sup>b</sup> |
|-----------|----------------------|-----------|----------------------|-----------|----------------------|-----------|----------------------|-----------|----------------------|
| 1.4       | 7.6                  | 7.4       | 64.5                 | 16.3      | 93.8                 | 28.0      | 98.9                 | 42.5      | 99.7                 |
| 1.7       | 11.4                 | 8.0       | 68.2                 | 17.1      | 94.4                 | 29.0      | 99.2                 | 43.8      | 99.8                 |
| 2.1       | 15.9                 | 8.6       | 71.5                 | 17.9      | 95.3                 | 30.1      | 99.5                 | 45.0      | 99.6                 |
| 2.5       | 20.0                 | 9.2       | 74.6                 | 18.8      | 96.1                 | 31.1      | 99.4                 | 46.3      | 99.7                 |
| 2.9       | 24.9                 | 9.9       | 77.5                 | 19.6      | 96.6                 | 32.2      | 99.3                 | 47.6      | 99.8                 |
| 3.4       | 29.4                 | 10.5      | 80.1                 | 20.5      | 97.1                 | 33.3      | 99.3                 | 48.9      | 99.7                 |
| 3.8       | 34.3                 | 11.2      | 82.5                 | 21.4      | 97.4                 | 34.4      | 99.4                 | 50.2      | 99.7                 |
| 4.3       | 38.8                 | 11.9      | 84.8                 | 22.3      | 97.9                 | 35.5      | 99.6                 | 51.5      | 99.6                 |
| 4.8       | 43.7                 | 12.6      | 86.7                 | 23.2      | 98.1                 | 36.6      | 99.7                 | 52.9      | 99.6                 |
| 5.3       | 48.1                 | 13.3      | 88.3                 | 24.1      | 98.3                 | 37.8      | 99.5                 |           |                      |
| 5.8       | 52.6                 | 14.0      | 89.9                 | 25.1      | 98.5                 | 38.9      | 99.6                 |           |                      |
| 6.3       | 56.6                 | 14.8      | 91.5                 | 26.0      | 98.8                 | 40.1      | 99.6                 |           |                      |
| 6.9       | 60.6                 | 15.5      | 92.4                 | 27.0      | 98.9                 | 41.3      | 99.5                 |           |                      |

<sup>a</sup> The reaction was carried out using **7** (0.80 μmol) and **12** (19.3 μl, 19.2 mg, 80 μmol) in CD<sub>2</sub>Cl<sub>2</sub> (800 μl) at 30 °C. <sup>b</sup> Conversion of **12** to **13** calculated from the ratio of integrals of the methylene protons of **12** and **13** in <sup>1</sup>H NMR spectrum.

**Table S2. Data for RCM of 12 by 8a<sup>a</sup>**

| time, min | conv, % <sup>b</sup> |
|-----------|----------------------|-----------|----------------------|-----------|----------------------|-----------|----------------------|-----------|----------------------|
| 0.7       | 0.2                  | 11.1      | 1.0                  | 38.5      | 6.4                  | 83.1      | 19.3                 | 144.7     | 44.3                 |
| 0.7       | -0.6                 | 11.7      | 1.3                  | 39.7      | 6.4                  | 84.7      | 19.4                 | 146.9     | 45.5                 |
| 0.8       | -0.3                 | 12.3      | 1.9                  | 40.8      | 7.1                  | 86.4      | 20.5                 | 149.1     | 46.4                 |
| 0.9       | -0.2                 | 12.9      | 1.9                  | 42.0      | 6.6                  | 88.1      | 21.1                 | 151.3     | 47.4                 |
| 1.0       | -0.1                 | 13.6      | 2.1                  | 43.2      | 7.3                  | 89.8      | 21.3                 | 153.6     | 47.9                 |
| 1.2       | -0.3                 | 14.2      | 1.8                  | 44.4      | 7.4                  | 91.6      | 22.1                 | 155.8     | 49.0                 |
| 1.3       | -0.4                 | 14.9      | 2.3                  | 45.6      | 7.3                  | 93.3      | 23.2                 | 158.1     | 50.0                 |
| 1.5       | -0.3                 | 15.6      | 2.4                  | 46.8      | 8.4                  | 95.1      | 23.6                 | 160.4     | 50.7                 |
| 1.7       | -0.4                 | 16.3      | 1.9                  | 48.1      | 8.2                  | 96.9      | 24.0                 | 162.7     | 51.6                 |
| 1.9       | -0.2                 | 17.1      | 2.8                  | 49.3      | 8.9                  | 98.7      | 25.0                 | 165.1     | 52.3                 |
| 2.1       | -0.1                 | 17.8      | 2.4                  | 50.6      | 8.8                  | 100.5     | 26.0                 | 167.4     | 52.5                 |
| 2.3       | 0.1                  | 18.6      | 2.2                  | 51.9      | 9.4                  | 102.3     | 26.3                 | 169.8     | 53.2                 |
| 2.6       | 0.5                  | 19.4      | 3.0                  | 53.2      | 9.3                  | 104.2     | 27.2                 | 172.2     | 53.4                 |
| 2.8       | 0.5                  | 20.2      | 2.8                  | 54.6      | 10.4                 | 106.0     | 28.3                 | 174.6     | 54.2                 |
| 3.1       | 0.2                  | 21.0      | 3.4                  | 55.9      | 10.0                 | 107.9     | 29.0                 | 177.0     | 54.7                 |
| 3.4       | 0.0                  | 21.8      | 3.2                  | 57.3      | 11.0                 | 109.8     | 29.5                 | 179.4     | 55.6                 |
| 3.7       | 0.4                  | 22.7      | 3.6                  | 58.7      | 11.6                 | 111.7     | 30.2                 | 181.9     | 55.9                 |
| 4.1       | 0.5                  | 23.5      | 3.1                  | 60.1      | 11.8                 | 113.7     | 31.1                 | 184.3     | 56.8                 |
| 4.4       | 0.0                  | 24.4      | 4.0                  | 61.5      | 11.6                 | 115.6     | 31.8                 | 186.8     | 57.6                 |
| 4.8       | 0.4                  | 25.3      | 3.6                  | 62.9      | 12.5                 | 117.6     | 33.1                 | 189.4     | 59.8                 |
| 5.2       | 0.4                  | 26.2      | 3.9                  | 64.4      | 13.0                 | 119.6     | 34.0                 | 191.9     | 60.3                 |
| 5.6       | 0.9                  | 27.2      | 3.8                  | 65.8      | 13.1                 | 121.6     | 34.8                 | 194.4     | 61.0                 |
| 6.0       | 0.9                  | 28.1      | 4.1                  | 67.3      | 14.1                 | 123.6     | 35.3                 | 197.0     | 61.8                 |
| 6.4       | 0.6                  | 29.1      | 4.1                  | 68.8      | 14.4                 | 125.6     | 36.2                 | 199.6     | 62.3                 |
| 6.9       | 0.2                  | 30.1      | 4.9                  | 70.3      | 14.6                 | 127.7     | 37.2                 | 202.1     | 63.1                 |
| 7.3       | 0.6                  | 31.1      | 4.9                  | 71.9      | 15.4                 | 129.7     | 38.3                 | 204.7     | 63.6                 |
| 7.8       | 1.2                  | 32.1      | 4.8                  | 73.4      | 16.0                 | 131.8     | 39.1                 | 207.4     | 64.4                 |
| 8.3       | 0.7                  | 33.1      | 4.8                  | 75.0      | 15.9                 | 133.9     | 39.8                 | 210.0     | 65.0                 |
| 8.8       | 1.2                  | 34.2      | 5.1                  | 76.6      | 16.6                 | 136.0     | 41.0                 | 212.6     | 65.5                 |
| 9.4       | 1.3                  | 35.2      | 6.0                  | 78.2      | 17.3                 | 138.2     | 41.8                 | 215.3     | 66.1                 |
| 9.9       | 0.9                  | 36.3      | 5.9                  | 79.8      | 18.0                 | 140.3     | 42.8                 | 218.0     | 66.8                 |
| 10.5      | 1.0                  | 37.4      | 6.0                  | 81.4      | 18.0                 | 142.5     | 43.6                 | 220.7     | 67.3                 |

**Table S2.** (Continued)

| time, min | conv, % <sup>b</sup> |
|-----------|----------------------|-----------|----------------------|-----------|----------------------|-----------|----------------------|-----------|----------------------|
| 223.4     | 68.0                 | 319.1     | 83.5                 | 431.9     | 92.1                 | 561.8     | 96.4                 | 708.7     | 98.3                 |
| 226.1     | 68.5                 | 322.4     | 84.0                 | 435.7     | 92.4                 | 566.1     | 96.3                 | 713.6     | 98.4                 |
| 228.9     | 69.2                 | 325.7     | 84.3                 | 439.6     | 92.7                 | 570.5     | 96.4                 | 718.5     | 98.3                 |
| 231.7     | 69.6                 | 329.0     | 84.6                 | 443.4     | 93.0                 | 574.9     | 96.5                 | 723.4     | 98.3                 |
| 234.4     | 70.3                 | 332.3     | 84.9                 | 447.2     | 92.9                 | 579.2     | 96.6                 | 728.3     | 98.6                 |
| 237.2     | 70.8                 | 335.6     | 85.2                 | 451.1     | 93.0                 | 583.6     | 96.6                 | 733.2     | 98.6                 |
| 240.1     | 71.4                 | 339.0     | 85.6                 | 455.0     | 93.3                 | 588.1     | 96.7                 | 738.2     | 98.6                 |
| 242.9     | 72.0                 | 342.4     | 85.9                 | 458.9     | 93.4                 | 592.5     | 96.9                 | 743.2     | 98.7                 |
| 245.7     | 72.5                 | 345.7     | 86.3                 | 462.8     | 93.7                 | 596.9     | 97.0                 | 748.1     | 98.8                 |
| 248.6     | 73.0                 | 349.1     | 86.6                 | 466.7     | 93.7                 | 601.4     | 96.9                 | 753.1     | 98.7                 |
| 251.5     | 73.6                 | 352.6     | 87.0                 | 470.7     | 93.9                 | 605.9     | 97.0                 | 758.2     | 98.6                 |
| 254.4     | 74.2                 | 356.0     | 87.4                 | 474.7     | 94.1                 | 610.4     | 97.1                 | 763.2     | 98.7                 |
| 257.3     | 74.7                 | 359.4     | 87.5                 | 478.6     | 94.0                 | 614.9     | 97.2                 | 768.2     | 98.9                 |
| 260.2     | 75.2                 | 362.9     | 87.8                 | 482.6     | 94.3                 | 619.4     | 97.4                 | 773.3     | 98.8                 |
| 263.2     | 75.6                 | 366.4     | 88.0                 | 486.7     | 94.3                 | 624.0     | 97.2                 | 778.4     | 98.8                 |
| 266.2     | 76.2                 | 369.9     | 88.2                 | 490.7     | 94.4                 | 628.6     | 97.3                 | 783.5     | 98.9                 |
| 269.1     | 76.6                 | 373.4     | 88.7                 | 494.7     | 94.5                 | 633.1     | 97.4                 | 788.6     | 98.9                 |
| 272.1     | 77.2                 | 376.9     | 88.8                 | 498.8     | 94.7                 | 637.7     | 105.7                | 793.7     | 98.9                 |
| 275.2     | 77.5                 | 380.5     | 89.1                 | 502.9     | 94.8                 | 642.4     | 97.3                 | 798.9     | 99.0                 |
| 278.2     | 78.1                 | 384.1     | 89.3                 | 507.0     | 94.9                 | 647.0     | 97.6                 | 804.1     | 98.9                 |
| 281.2     | 78.6                 | 387.6     | 89.6                 | 511.1     | 95.1                 | 651.6     | 97.7                 | 809.2     | 99.1                 |
| 284.3     | 79.0                 | 391.2     | 90.0                 | 515.2     | 95.1                 | 656.3     | 97.7                 | 814.4     | 99.1                 |
| 287.4     | 79.5                 | 394.9     | 90.2                 | 519.4     | 95.3                 | 661.0     | 98.0                 | 819.7     | 99.1                 |
| 290.5     | 79.9                 | 398.5     | 90.3                 | 523.6     | 95.4                 | 665.7     | 97.9                 | 824.9     | 99.0                 |
| 293.6     | 80.3                 | 402.1     | 90.6                 | 527.7     | 95.3                 | 670.4     | 98.1                 | 830.1     | 99.1                 |
| 296.7     | 80.8                 | 405.8     | 90.9                 | 531.9     | 95.6                 | 675.1     | 98.1                 | 835.4     | 99.0                 |
| 299.9     | 81.2                 | 409.5     | 91.0                 | 536.2     | 95.7                 | 679.9     | 98.0                 | 840.7     | 99.2                 |
| 303.1     | 81.6                 | 413.2     | 91.2                 | 540.4     | 95.8                 | 684.7     | 98.1                 | 846.0     | 99.2                 |
| 306.2     | 82.0                 | 416.9     | 91.5                 | 544.6     | 96.0                 | 689.4     | 98.2                 | 851.3     | 99.2                 |
| 309.4     | 82.4                 | 420.6     | 91.5                 | 548.9     | 96.1                 | 694.2     | 98.2                 | 856.6     | 99.2                 |
| 312.7     | 82.8                 | 424.4     | 91.8                 | 553.2     | 96.1                 | 699.1     | 98.3                 | 862.0     | 99.2                 |
| 315.9     | 83.1                 | 428.2     | 92.0                 | 557.5     | 96.3                 | 703.9     | 98.2                 |           |                      |

<sup>a</sup> The reaction was carried out using **8a** (0.80  $\mu$ mol) and **12** (19.3  $\mu$ l, 19.2 mg, 80  $\mu$ mol) in CD<sub>2</sub>Cl<sub>2</sub> (800  $\mu$ l) at 30 °C. <sup>b</sup> Conversion of **12** to **13** calculated from the ratio of integrals of the methylene protons of **12** and **13** in <sup>1</sup>H NMR spectrum.

**Table S3. Data for RCM of 12 by 8b<sup>a</sup>**

| time, min | conv, % <sup>b</sup> |
|-----------|----------------------|-----------|----------------------|-----------|----------------------|-----------|----------------------|-----------|----------------------|
| 0.9       | 0.0                  | 3.1       | -0.1                 | 8.0       | 0.3                  | 15.8      | 0.8                  | 26.5      | 2.6                  |
| 1.0       | -0.4                 | 3.3       | -0.2                 | 8.5       | 0.4                  | 16.6      | 0.9                  | 27.4      | 2.7                  |
| 1.0       | -0.2                 | 3.6       | 0.1                  | 9.1       | 0.7                  | 17.3      | 0.9                  | 28.3      | 2.4                  |
| 1.1       | -0.5                 | 4.0       | 0.0                  | 9.6       | 0.8                  | 18.0      | 1.0                  | 29.3      | 3.2                  |
| 1.3       | -0.1                 | 4.3       | -0.2                 | 10.1      | 1.1                  | 18.8      | 1.2                  | 30.3      | 2.9                  |
| 1.4       | -0.1                 | 4.6       | 0.2                  | 10.7      | 0.4                  | 19.6      | 1.4                  | 31.3      | 2.9                  |
| 1.5       | -0.3                 | 5.0       | 0.5                  | 11.3      | 0.6                  | 20.4      | 2.0                  | 32.3      | 2.9                  |
| 1.7       | -0.3                 | 5.4       | 0.4                  | 11.9      | 0.6                  | 21.2      | 2.2                  | 33.3      | 3.0                  |
| 1.9       | -0.3                 | 5.8       | 0.0                  | 12.5      | 0.6                  | 22.0      | 1.9                  | 34.4      | 3.2                  |
| 2.1       | 0.3                  | 6.2       | 0.8                  | 13.1      | 1.3                  | 22.9      | 2.1                  | 35.5      | 3.7                  |
| 2.3       | 0.0                  | 6.6       | 0.6                  | 13.8      | 0.6                  | 23.8      | 1.9                  | 36.5      | 3.9                  |
| 2.5       | -0.5                 | 7.1       | 0.2                  | 14.5      | 0.6                  | 24.6      | 1.9                  | 37.6      | 4.3                  |
| 2.8       | 0.1                  | 7.6       | 0.3                  | 15.1      | 0.8                  | 25.5      | 2.0                  | 38.8      | 4.3                  |

**Table S3.** (Continued)

| time, min | conv, % <sup>b</sup> |
|-----------|----------------------|-----------|----------------------|-----------|----------------------|-----------|----------------------|-----------|----------------------|
| 39.9      | 4.2                  | 61.7      | 9.3                  | 88.3      | 18.4                 | 119.8     | 33.4                 | 156.1     | 52.3                 |
| 41.0      | 4.3                  | 63.1      | 9.9                  | 90.1      | 19.3                 | 121.8     | 34.5                 | 158.3     | 53.4                 |
| 42.2      | 4.5                  | 64.6      | 10.1                 | 91.8      | 19.9                 | 123.8     | 35.4                 | 160.6     | 54.4                 |
| 43.4      | 4.6                  | 66.1      | 10.2                 | 93.5      | 20.8                 | 125.8     | 36.5                 | 163.0     | 55.3                 |
| 44.6      | 5.2                  | 67.5      | 10.8                 | 95.3      | 21.4                 | 127.9     | 37.5                 | 165.3     | 56.4                 |
| 45.8      | 5.3                  | 69.0      | 11.3                 | 97.1      | 22.3                 | 130.0     | 38.6                 | 167.6     | 57.7                 |
| 47.0      | 5.4                  | 70.6      | 12.1                 | 98.9      | 23.3                 | 132.0     | 39.9                 | 170.0     | 58.5                 |
| 48.3      | 5.8                  | 72.1      | 12.2                 | 100.7     | 23.9                 | 134.1     | 41.0                 | 172.4     | 59.8                 |
| 49.6      | 6.4                  | 73.6      | 12.8                 | 102.5     | 24.6                 | 136.3     | 42.3                 | 174.8     | 60.5                 |
| 50.8      | 6.7                  | 75.2      | 13.4                 | 104.4     | 25.6                 | 138.4     | 43.2                 | 177.2     | 61.9                 |
| 52.1      | 6.7                  | 76.8      | 13.9                 | 106.3     | 26.5                 | 140.5     | 44.4                 | 179.6     | 62.7                 |
| 53.5      | 7.4                  | 78.4      | 14.6                 | 108.1     | 27.2                 | 142.7     | 45.4                 | 182.1     | 63.9                 |
| 54.8      | 7.4                  | 80.0      | 15.1                 | 110.0     | 28.4                 | 144.9     | 46.8                 | 184.6     | 64.7                 |
| 56.1      | 7.6                  | 81.6      | 15.7                 | 112.0     | 29.6                 | 147.1     | 47.7                 | 187.0     | 65.9                 |
| 57.5      | 7.9                  | 83.3      | 16.1                 | 113.9     | 30.5                 | 149.3     | 48.9                 | 189.5     | 66.6                 |
| 58.9      | 8.2                  | 85.0      | 16.9                 | 115.8     | 31.4                 | 151.5     | 49.8                 |           |                      |
| 60.3      | 9.2                  | 86.6      | 17.6                 | 117.8     | 32.5                 | 153.8     | 51.2                 |           |                      |

<sup>a</sup> The reaction was carried out using **8b** (0.80 μmol) and **12** (19.3 μl, 19.2 mg, 80 μmol) in CD<sub>2</sub>Cl<sub>2</sub> (800 μl) at 30 °C. <sup>b</sup> Conversion of **12** to **13** calculated from the ratio of integrals of the methylene protons of **12** and **13** in <sup>1</sup>H NMR spectrum.

**Table S4. Data for RCM of 12 by 8c<sup>a</sup>**

| time, min | conv, % <sup>b</sup> |
|-----------|----------------------|-----------|----------------------|-----------|----------------------|-----------|----------------------|-----------|----------------------|
| 0.7       | 1.0                  | 8.8       | 2.1                  | 30.1      | 7.5                  | 64.4      | 20.1                 | 111.7     | 39.2                 |
| 0.7       | 0.8                  | 9.4       | 2.3                  | 31.1      | 7.7                  | 65.8      | 20.8                 | 113.7     | 40.0                 |
| 0.8       | 1.0                  | 9.9       | 2.3                  | 32.1      | 8.1                  | 67.3      | 21.2                 | 115.6     | 40.8                 |
| 0.9       | 1.3                  | 10.5      | 2.2                  | 33.1      | 8.4                  | 68.8      | 22.0                 | 117.6     | 41.6                 |
| 1.0       | 0.8                  | 11.1      | 2.7                  | 34.2      | 8.6                  | 70.3      | 22.6                 | 119.6     | 42.3                 |
| 1.2       | 1.0                  | 11.7      | 2.4                  | 35.2      | 9.0                  | 71.9      | 23.2                 | 121.6     | 43.0                 |
| 1.3       | 0.8                  | 12.3      | 2.7                  | 36.3      | 9.7                  | 73.4      | 23.9                 | 123.6     | 43.8                 |
| 1.5       | 0.8                  | 12.9      | 2.7                  | 37.4      | 10.0                 | 75.0      | 24.6                 | 125.6     | 44.6                 |
| 1.7       | 0.8                  | 13.6      | 3.3                  | 38.5      | 10.4                 | 76.6      | 25.1                 | 127.7     | 45.3                 |
| 1.9       | 1.1                  | 14.2      | 3.1                  | 39.7      | 10.8                 | 78.2      | 25.6                 | 129.7     | 46.1                 |
| 2.1       | 1.2                  | 14.9      | 3.6                  | 40.8      | 11.3                 | 79.8      | 26.4                 | 131.8     | 47.0                 |
| 2.3       | 1.0                  | 15.6      | 3.3                  | 42.0      | 11.3                 | 81.4      | 27.2                 | 133.9     | 47.6                 |
| 2.6       | 1.2                  | 16.3      | 3.5                  | 43.2      | 11.9                 | 83.1      | 27.9                 | 136.0     | 48.3                 |
| 2.8       | 1.2                  | 17.1      | 3.7                  | 44.4      | 12.3                 | 84.7      | 28.4                 | 138.2     | 49.1                 |
| 3.1       | 1.2                  | 17.8      | 3.8                  | 45.6      | 12.8                 | 86.4      | 29.2                 | 140.3     | 49.9                 |
| 3.4       | 1.5                  | 18.6      | 3.9                  | 46.8      | 13.5                 | 88.1      | 30.0                 | 142.5     | 50.7                 |
| 3.7       | 1.5                  | 19.4      | 4.6                  | 48.1      | 14.0                 | 89.8      | 30.6                 | 144.7     | 51.5                 |
| 4.1       | 1.5                  | 20.2      | 4.7                  | 49.3      | 14.4                 | 91.6      | 31.3                 | 146.9     | 52.1                 |
| 4.4       | 1.3                  | 21.0      | 4.6                  | 50.6      | 14.7                 | 93.3      | 31.8                 | 149.1     | 52.9                 |
| 4.8       | 1.3                  | 21.8      | 5.0                  | 51.9      | 15.2                 | 95.1      | 32.6                 | 151.3     | 53.8                 |
| 5.2       | 1.7                  | 22.7      | 5.0                  | 53.2      | 15.7                 | 96.9      | 33.3                 | 153.6     | 54.5                 |
| 5.6       | 1.7                  | 23.5      | 5.5                  | 54.6      | 16.3                 | 98.7      | 34.1                 | 155.8     | 55.3                 |
| 6.0       | 1.5                  | 24.4      | 5.5                  | 55.9      | 16.7                 | 100.5     | 34.8                 | 158.1     | 55.9                 |
| 6.4       | 1.6                  | 25.3      | 5.8                  | 57.3      | 17.2                 | 102.3     | 35.6                 | 160.4     | 56.7                 |
| 6.9       | 1.4                  | 26.2      | 6.4                  | 58.7      | 17.8                 | 104.2     | 36.4                 | 162.7     | 57.4                 |
| 7.3       | 1.6                  | 27.2      | 6.5                  | 60.1      | 18.4                 | 106.0     | 37.0                 | 165.1     | 58.0                 |
| 7.8       | 1.9                  | 28.1      | 7.0                  | 61.5      | 19.0                 | 107.9     | 37.9                 | 167.4     | 58.7                 |
| 8.3       | 1.9                  | 29.1      | 7.3                  | 62.9      | 19.5                 | 109.8     | 38.6                 | 169.8     | 59.6                 |

**Table S4.** (Continued)

| time, min | conv, % <sup>b</sup> |
|-----------|----------------------|-----------|----------------------|-----------|----------------------|-----------|----------------------|-----------|----------------------|
| 172.2     | 60.3                 | 266.1     | 81.0                 | 380.4     | 91.5                 | 515.2     | 96.0                 | 670.3     | 97.4                 |
| 174.6     | 61.0                 | 269.1     | 81.4                 | 384.0     | 92.0                 | 519.3     | 96.1                 | 675.1     | 97.4                 |
| 177.0     | 61.6                 | 272.1     | 81.8                 | 387.6     | 92.0                 | 523.5     | 96.3                 | 679.8     | 97.7                 |
| 179.4     | 62.5                 | 275.1     | 82.3                 | 391.2     | 92.2                 | 527.7     | 96.1                 | 684.6     | 97.7                 |
| 181.9     | 63.0                 | 278.1     | 82.7                 | 394.8     | 92.4                 | 531.9     | 96.4                 | 689.4     | 97.6                 |
| 184.3     | 63.9                 | 281.2     | 83.0                 | 398.4     | 92.6                 | 536.1     | 96.2                 | 694.2     | 97.7                 |
| 186.8     | 64.4                 | 284.2     | 83.3                 | 402.1     | 92.7                 | 540.3     | 96.4                 | 699.0     | 97.7                 |
| 189.3     | 65.2                 | 287.3     | 84.0                 | 405.7     | 92.9                 | 544.6     | 96.5                 | 703.8     | 97.6                 |
| 191.8     | 65.8                 | 290.4     | 84.1                 | 409.4     | 92.9                 | 548.8     | 96.5                 | 708.7     | 97.9                 |
| 194.4     | 66.4                 | 293.5     | 84.6                 | 413.1     | 93.2                 | 553.1     | 96.7                 | 713.5     | 98.0                 |
| 196.9     | 67.0                 | 296.7     | 85.0                 | 416.8     | 93.3                 | 557.4     | 96.6                 | 718.4     | 97.8                 |
| 199.5     | 67.8                 | 299.8     | 85.3                 | 420.6     | 93.4                 | 561.7     | 97.0                 | 723.3     | 97.9                 |
| 202.1     | 68.4                 | 303.0     | 85.5                 | 424.3     | 93.8                 | 566.1     | 96.6                 | 728.2     | 97.9                 |
| 204.7     | 69.0                 | 306.2     | 86.1                 | 428.1     | 93.8                 | 570.4     | 96.9                 | 733.2     | 97.7                 |
| 207.3     | 69.8                 | 309.4     | 86.2                 | 431.9     | 94.0                 | 574.8     | 96.7                 | 738.1     | 97.8                 |
| 209.9     | 70.3                 | 312.6     | 86.5                 | 435.7     | 94.1                 | 579.2     | 96.7                 | 743.1     | 97.9                 |
| 212.6     | 71.0                 | 315.8     | 86.9                 | 439.5     | 94.2                 | 583.6     | 97.0                 | 748.1     | 97.7                 |
| 215.2     | 71.6                 | 319.1     | 87.2                 | 443.3     | 94.2                 | 588.0     | 96.9                 | 753.1     | 98.1                 |
| 217.9     | 72.1                 | 322.3     | 87.6                 | 447.2     | 94.5                 | 592.4     | 97.2                 | 758.1     | 98.1                 |
| 220.6     | 72.6                 | 325.6     | 87.8                 | 451.0     | 94.7                 | 596.9     | 97.0                 | 763.1     | 98.0                 |
| 223.3     | 73.2                 | 328.9     | 88.2                 | 454.9     | 94.7                 | 601.3     | 97.0                 | 768.2     | 97.9                 |
| 226.1     | 73.7                 | 332.2     | 88.3                 | 458.8     | 95.0                 | 605.8     | 97.0                 | 773.2     | 97.9                 |
| 228.8     | 74.4                 | 335.6     | 88.6                 | 462.7     | 95.0                 | 610.3     | 97.1                 | 778.3     | 98.1                 |
| 231.6     | 74.9                 | 338.9     | 88.9                 | 466.7     | 94.7                 | 614.8     | 97.4                 | 783.4     | 98.1                 |
| 234.4     | 75.4                 | 342.3     | 89.3                 | 470.6     | 95.2                 | 619.4     | 97.1                 | 788.5     | 98.1                 |
| 237.2     | 76.0                 | 345.7     | 89.3                 | 474.6     | 95.3                 | 623.9     | 97.3                 | 793.7     | 98.1                 |
| 240.0     | 76.6                 | 349.1     | 89.6                 | 478.6     | 95.4                 | 628.5     | 97.4                 | 798.8     | 98.0                 |
| 242.8     | 77.1                 | 352.5     | 90.0                 | 482.6     | 95.2                 | 633.1     | 97.3                 | 804.0     | 98.4                 |
| 245.7     | 77.5                 | 355.9     | 90.1                 | 486.6     | 95.5                 | 637.7     | 96.9                 | 809.2     | 98.1                 |
| 248.5     | 78.0                 | 359.4     | 90.4                 | 490.6     | 95.9                 | 642.3     | 97.4                 | 814.4     | 98.2                 |
| 251.4     | 78.6                 | 362.8     | 90.7                 | 494.7     | 95.6                 | 646.9     | 97.4                 | 819.6     | 97.9                 |
| 254.3     | 79.2                 | 366.3     | 90.8                 | 498.7     | 95.7                 | 651.6     | 97.4                 | 824.8     | 98.2                 |
| 257.2     | 79.5                 | 369.8     | 91.1                 | 502.8     | 95.9                 | 656.2     | 97.5                 | 830.1     | 98.0                 |
| 260.2     | 80.0                 | 373.3     | 91.4                 | 506.9     | 96.1                 | 660.9     | 97.5                 | 835.3     | 98.1                 |
| 263.1     | 80.5                 | 376.9     | 91.3                 | 511.0     | 95.7                 | 665.6     | 97.3                 |           |                      |

<sup>a</sup> The reaction was carried out using **8c** (0.80  $\mu$ mol) and **12** (19.3  $\mu$ l, 19.2 mg, 80  $\mu$ mol) in CD<sub>2</sub>Cl<sub>2</sub> (800  $\mu$ l) at 30 °C. <sup>b</sup> Conversion of **12** to **13** calculated from the ratio of integrals of the methylene protons of **12** and **13** in <sup>1</sup>H NMR spectrum.

**Table S5. Data for RCM of 12 by 11a<sup>a</sup>**

| time, min | conv, % <sup>b</sup> |
|-----------|----------------------|-----------|----------------------|-----------|----------------------|-----------|----------------------|-----------|----------------------|
| 0.8       | -0.1                 | 2.2       | -0.2                 | 5.3       | 0.4                  | 10.0      | 0.7                  | 16.4      | 1.2                  |
| 0.8       | -0.1                 | 2.4       | 0.2                  | 5.7       | 0.5                  | 10.6      | 0.7                  | 17.2      | 1.6                  |
| 0.9       | -0.4                 | 2.7       | -0.2                 | 6.1       | 0.5                  | 11.2      | 0.7                  | 17.9      | 1.5                  |
| 1.0       | -0.3                 | 2.9       | 0.2                  | 6.5       | 0.3                  | 11.8      | 1.0                  | 18.7      | 1.8                  |
| 1.1       | -0.2                 | 3.2       | 0.0                  | 7.0       | 0.4                  | 12.4      | 0.9                  | 19.5      | 1.8                  |
| 1.3       | -0.1                 | 3.5       | 0.0                  | 7.4       | 0.6                  | 13.0      | 0.8                  | 20.3      | 1.7                  |
| 1.4       | 0.0                  | 3.8       | 0.0                  | 7.9       | 0.7                  | 13.7      | 0.9                  | 21.1      | 1.9                  |
| 1.6       | -0.2                 | 4.2       | 0.0                  | 8.4       | 0.4                  | 14.3      | 0.9                  | 21.9      | 2.0                  |
| 1.8       | -0.2                 | 4.5       | 0.0                  | 8.9       | 0.5                  | 15.0      | 1.2                  | 22.8      | 2.0                  |
| 2.0       | -0.2                 | 4.9       | 0.1                  | 9.5       | 0.6                  | 15.7      | 1.3                  | 23.6      | 1.9                  |

**Table S5.** (Continued)

| time, min | conv, % <sup>b</sup> |
|-----------|----------------------|-----------|----------------------|-----------|----------------------|-----------|----------------------|-----------|----------------------|
| 24.5      | 2.3                  | 42.1      | 3.9                  | 64.5      | 5.9                  | 91.7      | 7.9                  | 123.7     | 9.8                  |
| 25.4      | 2.1                  | 43.3      | 4.0                  | 65.9      | 6.0                  | 93.4      | 8.1                  | 125.7     | 9.8                  |
| 26.3      | 2.5                  | 44.5      | 4.1                  | 67.4      | 6.3                  | 95.2      | 8.0                  | 127.8     | 9.9                  |
| 27.3      | 2.6                  | 45.7      | 4.3                  | 68.9      | 6.2                  | 97.0      | 8.3                  | 129.8     | 10.2                 |
| 28.2      | 2.4                  | 46.9      | 4.5                  | 70.4      | 6.5                  | 98.8      | 8.3                  | 131.9     | 10.0                 |
| 29.2      | 2.8                  | 48.2      | 4.3                  | 72.0      | 6.5                  | 100.6     | 8.6                  | 134.0     | 10.2                 |
| 30.2      | 2.9                  | 49.4      | 4.5                  | 73.5      | 6.6                  | 102.4     | 8.6                  | 136.1     | 10.3                 |
| 31.2      | 2.7                  | 50.7      | 4.8                  | 75.1      | 6.6                  | 104.3     | 8.7                  | 138.3     | 10.4                 |
| 32.2      | 3.0                  | 52.0      | 4.9                  | 76.7      | 7.0                  | 106.1     | 9.0                  | 140.4     | 10.3                 |
| 33.2      | 3.2                  | 53.3      | 5.0                  | 78.3      | 7.0                  | 108.0     | 9.0                  | 142.6     | 10.5                 |
| 34.3      | 3.1                  | 54.7      | 5.2                  | 79.9      | 7.2                  | 109.9     | 9.1                  | 144.8     | 10.6                 |
| 35.3      | 3.3                  | 56.0      | 5.3                  | 81.5      | 7.2                  | 111.8     | 9.1                  | 147.0     | 10.6                 |
| 36.4      | 3.3                  | 57.4      | 5.2                  | 83.2      | 7.3                  | 113.8     | 9.3                  | 149.2     | 10.7                 |
| 37.5      | 3.4                  | 58.8      | 5.6                  | 84.8      | 7.4                  | 115.7     | 9.4                  |           |                      |
| 38.6      | 3.7                  | 60.2      | 5.7                  | 86.5      | 7.5                  | 117.7     | 9.4                  |           |                      |
| 39.8      | 3.9                  | 61.6      | 5.6                  | 88.2      | 7.7                  | 119.7     | 9.8                  |           |                      |
| 40.9      | 3.7                  | 63.0      | 5.9                  | 89.9      | 7.9                  | 121.7     | 9.7                  |           |                      |

<sup>a</sup> The reaction was carried out using **11a** (0.80  $\mu$ mol) and **12** (19.3  $\mu$ l, 19.2 mg, 80  $\mu$ mol) in CD<sub>2</sub>Cl<sub>2</sub> (800  $\mu$ l) at 30 °C. <sup>b</sup> Conversion of **12** to **13** calculated from the ratio of integrals of the methylene protons of **12** and **13** in <sup>1</sup>H NMR spectrum.

**Table S6.** GC response factors and retention times<sup>a</sup>

| compound    | response factor <sup>b</sup> | retention time, min |
|-------------|------------------------------|---------------------|
| tridecane   | --                           | 11.7                |
| <b>14</b>   | 1.20                         | 10.9                |
| <b>Z-15</b> | 2.48                         | 18.3                |
| <b>E-15</b> | 2.48                         | 18.6                |
| <b>Z-16</b> | 1.30                         | 21.4                |
| <b>E-16</b> | 1.30                         | 21.7                |
| <b>Z-17</b> | 1.03                         | 24.5                |
| <b>E-17</b> | 1.03                         | 24.3                |

<sup>a</sup> Instrument conditions were as follows; Inlet temperature: 250 °C, detector temperature: 250 °C, hydrogen flow: 32 ml/min, air flow: 400 ml/min, constant col + makeup flow: 30 ml/min. GC Method was as follows; 50 °C for 5 min, followed by a temperature increase of 10 °C/min to 240 °C and a subsequent isothermal period at 240 °C for 5 min (total run time = 29 min). Response factors and retention times are instrument dependent; values may vary on alternate machines. <sup>b</sup> Determined by reported method.<sup>S3</sup>

**Table S7. Data for CM of 14 and 15 by 7<sup>a</sup>**

| time<br>min | 16                           |                         | 17                           |                         |
|-------------|------------------------------|-------------------------|------------------------------|-------------------------|
|             | conversion <sup>b</sup><br>% | <i>E/Z</i> <sup>c</sup> | conversion <sup>b</sup><br>% | <i>E/Z</i> <sup>c</sup> |
| 1           | 70                           | 6.2                     | 2                            | 3.6                     |
| 2           | 75                           | 8.4                     | 4                            | 4.4                     |
| 5           | 75                           | 10.0                    | 6                            | 4.9                     |
| 8           | 74                           | 10.1                    | 4                            | 5.3                     |
| 10          | 73                           | 10.1                    | 4                            | 5.6                     |
| 15          | 72                           | 10.1                    | 5                            | 5.9                     |
| 20          | 72                           | 10.0                    | 5                            | 5.8                     |
| 30          | 72                           | 10.1                    | 5                            | 5.9                     |

<sup>a</sup> The reaction was carried out using **7** (3.1 mg, 5.0 μmol), **14** (0.20 mmol), **15** (0.40 mmol) and tridecane (0.10 mmol) in 1.0 ml of CH<sub>2</sub>Cl<sub>2</sub> at 23 °C. <sup>b</sup> Conversion of **14** to the product determined by GC analysis. <sup>c</sup> Molar ratio of *E* isomer and *Z* isomer of the product determined by GC analysis.

**Table S8. Data for CM of 14 and 15 by 8a<sup>a</sup>**

| time<br>min | 16                           |                         | 17                           |                         |
|-------------|------------------------------|-------------------------|------------------------------|-------------------------|
|             | conversion <sup>b</sup><br>% | <i>E/Z</i> <sup>c</sup> | conversion <sup>b</sup><br>% | <i>E/Z</i> <sup>c</sup> |
| 5           | 6.6                          | 2.67                    | 0.0                          | (NA) <sup>d</sup>       |
| 10          | 11.0                         | 2.99                    | 0.0                          | (NA) <sup>d</sup>       |
| 15          | 17.2                         | 2.98                    | 0.0                          | (NA) <sup>d</sup>       |
| 30          | 33.8                         | 3.27                    | 0.0                          | (NA) <sup>d</sup>       |
| 45          | 46.9                         | 3.76                    | 0.0                          | (NA) <sup>d</sup>       |
| 60          | 56.6                         | 4.34                    | 0.0                          | (NA) <sup>d</sup>       |
| 90          | 66.7                         | 5.27                    | 2.9                          | (NA) <sup>d</sup>       |
| 120         | 73.9                         | 6.14                    | 2.5                          | (NA) <sup>d</sup>       |
| 240         | 80.9                         | 8.79                    | 4.9                          | (NA) <sup>d</sup>       |
| 480         | 78.8                         | 10.6                    | 8.9                          | 6.97                    |

<sup>a</sup> The reaction was carried out using **8a** (4.7 mg, 5.0 μmol), **14** (0.20 mmol), **15** (0.40 mmol) and tridecane (0.10 mmol) in 1.0 ml of CH<sub>2</sub>Cl<sub>2</sub> at 23 °C. <sup>b</sup> Conversion of **14** to the product determined by GC analysis. <sup>c</sup> Molar ratio of *E* isomer and *Z* isomer of the product determined by GC analysis. <sup>d</sup> GC signal of the product was too small to quantify.



**Table S9. Data for CM of 14 and 15 by 8b<sup>a</sup>**

| time<br>min | <b>16</b>                    |                         | <b>17</b>                    |                         |
|-------------|------------------------------|-------------------------|------------------------------|-------------------------|
|             | conversion <sup>b</sup><br>% | <i>E/Z</i> <sup>c</sup> | conversion <sup>b</sup><br>% | <i>E/Z</i> <sup>c</sup> |
| 5           | 2.2                          | NA                      | 0.0                          | (NA) <sup>d</sup>       |
| 10          | 7.4                          | 2.62                    | 0.0                          | (NA) <sup>d</sup>       |
| 15          | 11.9                         | 2.82                    | 0.0                          | (NA) <sup>d</sup>       |
| 30          | 28.4                         | 3.16                    | 0.0                          | (NA) <sup>d</sup>       |
| 45          | 41.9                         | 3.46                    | 0.0                          | (NA) <sup>d</sup>       |
| 60          | 51.5                         | 3.84                    | 1.5                          | (NA) <sup>d</sup>       |
| 90          | 64.6                         | 4.77                    | 2.2                          | (NA) <sup>d</sup>       |
| 120         | 73.1                         | 5.70                    | 2.8                          | (NA) <sup>d</sup>       |
| 240         | 81.1                         | 8.41                    | 4.9                          | (NA) <sup>d</sup>       |
| 480         | 79.1                         | 9.95                    | 9.4                          | 5.18                    |

<sup>a</sup> The reaction was carried out using **8b** (5.0 mg, 5.0 μmol), **14** (0.20 mmol), **15** (0.40 mmol) and tridecane (0.10 mmol) in 1.0 ml of CH<sub>2</sub>Cl<sub>2</sub> at 23 °C. <sup>b</sup> Conversion of **14** to the product determined by GC analysis. <sup>c</sup> Molar ratio of *E* isomer and *Z* isomer of the product determined by GC analysis. <sup>d</sup> GC signal of the product was too small to quantify.

**Table S10. Data for CM of 14 and 15 by 11a<sup>a</sup>**

| time<br>min | <b>16</b>                    |                         | <b>17</b>                    |                         |
|-------------|------------------------------|-------------------------|------------------------------|-------------------------|
|             | conversion <sup>b</sup><br>% | <i>E/Z</i> <sup>c</sup> | conversion <sup>b</sup><br>% | <i>E/Z</i> <sup>c</sup> |
| 5           | 0.0                          | NA                      | 0.0                          | (NA) <sup>d</sup>       |
| 10          | 1.1                          | NA                      | 0.0                          | (NA) <sup>d</sup>       |
| 15          | 1.9                          | NA                      | 0.0                          | (NA) <sup>d</sup>       |
| 30          | 6.2                          | 2.22                    | 0.0                          | (NA) <sup>d</sup>       |
| 45          | 9.7                          | 2.70                    | 0.0                          | (NA) <sup>d</sup>       |
| 60          | 13.8                         | 2.95                    | 0.0                          | (NA) <sup>d</sup>       |
| 90          | 24.4                         | 2.88                    | 0.0                          | (NA) <sup>d</sup>       |
| 120         | 33.7                         | 3.20                    | 0.0                          | (NA) <sup>d</sup>       |
| 240         | 46.2                         | 3.57                    | 0.0                          | (NA) <sup>d</sup>       |
| 480         | 46.9                         | 3.59                    | 0.0                          | (NA) <sup>d</sup>       |

<sup>a</sup> The reaction was carried out using **11a** (10.8 mg, 10.0 μmol), **14** (0.20 mmol), **15** (0.40 mmol) and tridecane (0.10 mmol) in 1.0 ml of CH<sub>2</sub>Cl<sub>2</sub> at 23 °C. <sup>b</sup> Conversion of **14** to the product determined by GC analysis. <sup>c</sup> Molar ratio of *E* isomer and *Z* isomer of the product determined by GC analysis. <sup>d</sup> GC signal of the product was too small to quantify.

**Table S11. Data for CM of 14 and 15 by 11b<sup>a</sup>**

| time<br>min | <b>16</b>                    |                         | <b>17</b>                    |                         |
|-------------|------------------------------|-------------------------|------------------------------|-------------------------|
|             | conversion <sup>b</sup><br>% | <i>E/Z</i> <sup>c</sup> | conversion <sup>b</sup><br>% | <i>E/Z</i> <sup>c</sup> |
| 5           | 0.0                          | (NA) <sup>d</sup>       | 0.0                          | (NA) <sup>d</sup>       |
| 10          | 0.0                          | (NA) <sup>d</sup>       | 0.0                          | (NA) <sup>d</sup>       |
| 15          | 0.0                          | (NA) <sup>d</sup>       | 0.0                          | (NA) <sup>d</sup>       |
| 30          | 0.0                          | (NA) <sup>d</sup>       | 0.0                          | (NA) <sup>d</sup>       |
| 45          | 0.0                          | (NA) <sup>d</sup>       | 0.0                          | (NA) <sup>d</sup>       |
| 60          | 0.0                          | (NA) <sup>d</sup>       | 0.0                          | (NA) <sup>d</sup>       |
| 90          | 0.0                          | (NA) <sup>d</sup>       | 0.0                          | (NA) <sup>d</sup>       |
| 120         | 0.0                          | (NA) <sup>d</sup>       | 0.0                          | (NA) <sup>d</sup>       |
| 240         | 0.0                          | (NA) <sup>d</sup>       | 0.0                          | (NA) <sup>d</sup>       |
| 480         | 0.0                          | (NA) <sup>d</sup>       | 0.0                          | (NA) <sup>d</sup>       |

<sup>a</sup> The reaction was carried out using **11b** (10.9 mg, 10.0  $\mu$ mol), **14** (0.20 mmol), **15** (0.40 mmol) and tridecane (0.10 mmol) in 1.0 ml of CH<sub>2</sub>Cl<sub>2</sub> at 23 °C. <sup>b</sup> Conversion of **14** to the product determined by GC analysis. <sup>c</sup> Molar ratio of *E* isomer and *Z* isomer of the product determined by GC analysis. <sup>d</sup> GC signal of the product was too small to quantify.
